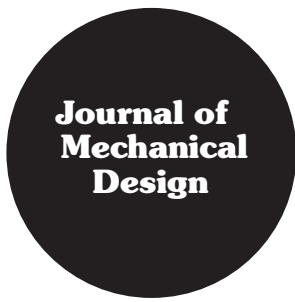

# Editorial

Our research community has benefited from the hard work of all of our Associate Editors and I would like to recognize seven whose terms have ended this year. You and even some of them may not realize that their terms have ended because I have extended some of their terms for a few months while I work with the new Technical Editor to put his team in place.

They are:

Professor David B. Dooner, Department of Mechanical Engineering, University of Puerto Rico, Technical Area: Power Transmission and Gearing.

Professor Kemper E. Lewis, Department of Mechanical and Aerospace Engineering, University at Buffalo, The State University of New York, Technical Area: Design Automation.

Professor Hashem Ashrafiuon, Department of Mechanical Engineering, Villanova University, Technical Area: Mechanisms and Robotics.

Professor Teik Lim, Department of Mechanical, Industrial and Nuclear Engineering, University of Cincinnati, Technical Area: Power Transmission and Gearing.

Professor Shapour Azarm, Department of Mechanical Engineering, University of Maryland, Technical Area: Design Automation.

Professor Larry L. Howell, Department of Mechanical Engineering, Brigham Young University, Technical Area: Mechanisms and Robotics.

Professor Thomas R. Chase, Department of Mechanical Engineering, University of Minnesota, Technical Area: Mechanisms and Robotics.

As you know our Associate Editors are the face of the *Journal of Mechanical Design* to our authors, and are trusted by their colleagues to manage the peer review process. The recent recognition of the quality of the *Journal of Mechanical Design* as among the top 10 Mechanical Engineering journals is the direct result of their dedication.

Please take a moment in the International Design Engineering Technical Conference, which occurs 4–7 September 2007 in Las Vegas, Nevada to thank them personally.

**J. Michael McCarthy**
